# Supplementary material for: Extraction of Polyphenols and Vitamins Using Biodegradable ATPS Based on Ethyl Lactate
Source: MDPI journal article supplement (doi:10.3390/molecules27227838), 2022-11-14
Supplement: s1 [file s1]

## **Supplementary Materials**

### **Extraction of polyphenols and vitamins using biodegradable ATPS based on ethyl lactate**

**Pedro Velho <sup>1,2</sup>, Luís Marques <sup>1,2</sup>, Eugénia A. Macedo <sup>1,2,\*</sup>**

<sup>1</sup> LSRE-LCM - Laboratory of Separation and Reaction Engineering – Laboratory of Catalysis and Materials, Faculty of Engineering, University of Porto, Rua Dr. Roberto Frias, 4200-465 Porto, Portugal.

<sup>2</sup> ALiCE - Associate Laboratory in Chemical Engineering, Faculty of Engineering, University of Porto, Rua Dr. Roberto Frias, 4200-465 Porto, Portugal.

\*Corresponding author. Phone: +351 220 411 653. E-mail: eamacedo@fe.up.pt

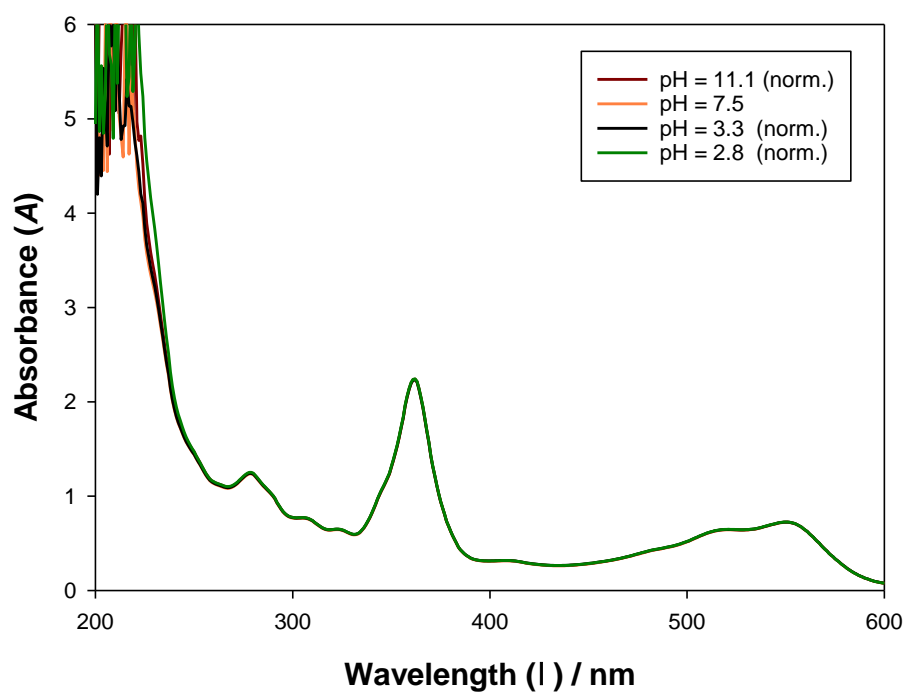

**Figure S1** - Influence of pH in the UV-Vis absorbance spectra of vitamin B12 ( $3.12 \cdot 10^4 \text{ g}\cdot\text{mL}^{-1}$ ) at 298.15 K and 0.1 MPa.

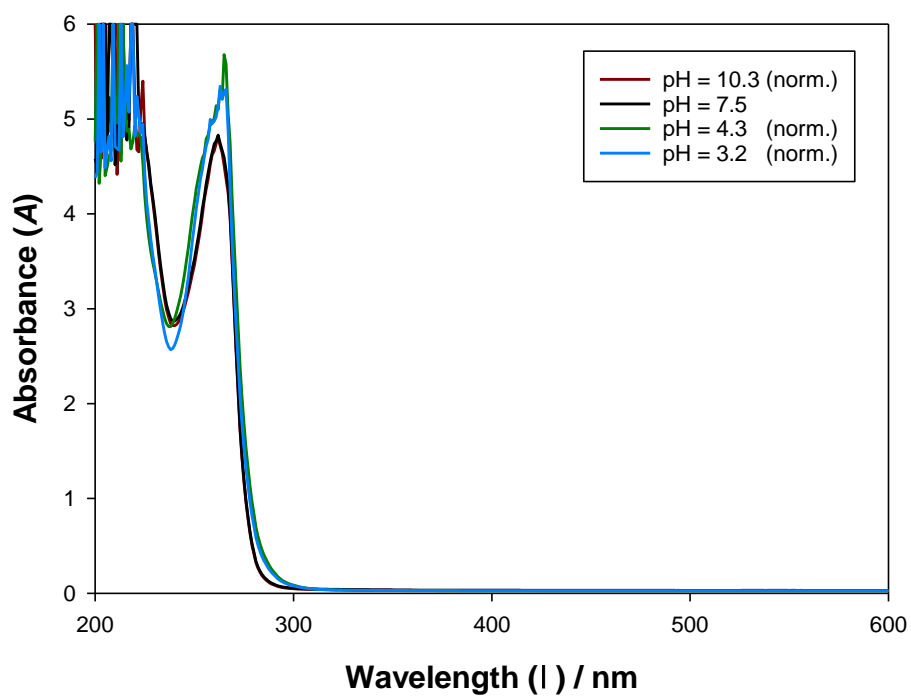

**Figure S2** - Influence of pH in the UV-Vis absorbance spectra of nicotinic acid ( $2.50 \cdot 10^{-4} \text{ g}\cdot\text{mL}^{-1}$  and pH = 7.5) at 298.15 K and 0.1 MPa.

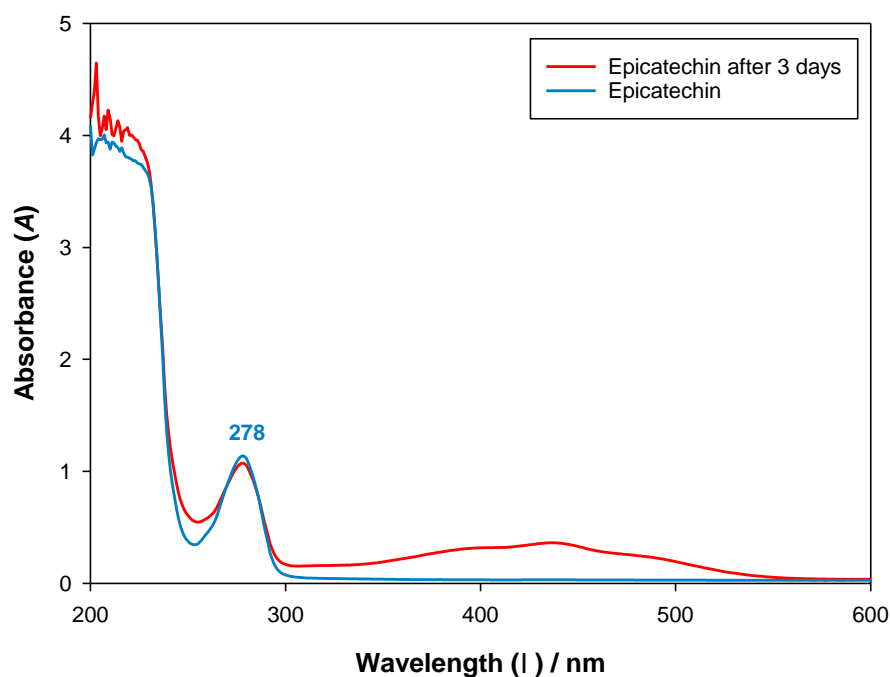

**Figure S3** – UV-Vis absorbance spectra of the aqueous stock solution of epicatechin ( $1.54 \cdot 10^{-4} \text{ g} \cdot \text{mL}^{-1}$  and  $\text{pH} = 7.5$ ) in the moment of preparation and after 3 days of settling at 298.15 K and 0.1 MPa.

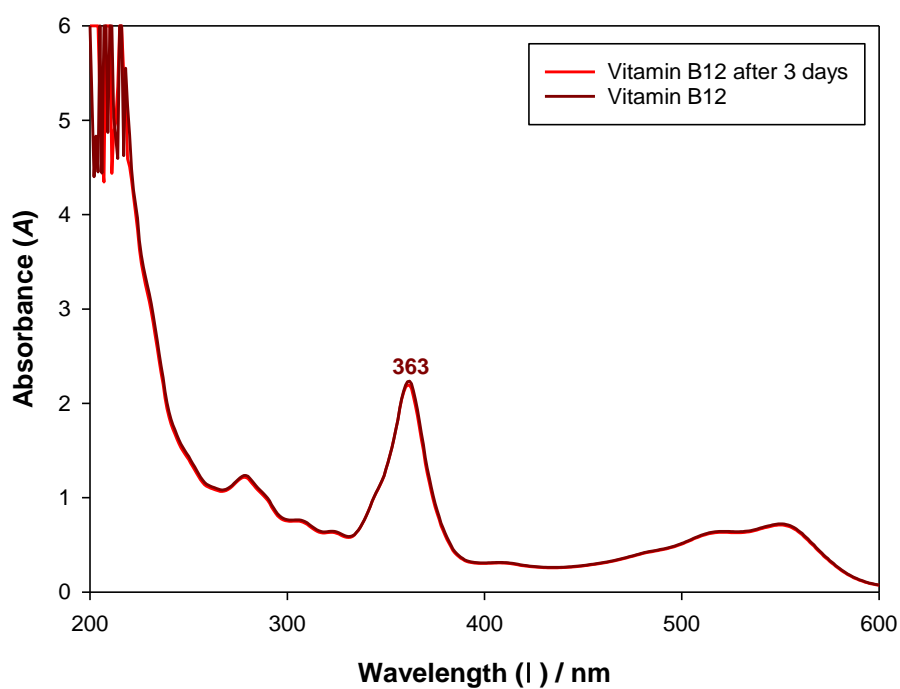

**Figure S4** – UV-Vis absorbance spectra of the aqueous stock solution of vitamin B12 ( $3.12 \cdot 10^{-4} \text{ g} \cdot \text{mL}^{-1}$  and  $\text{pH} = 7.5$ ) in the moment of preparation and after 3 days of settling at 298.15 K and 0.1 MPa.

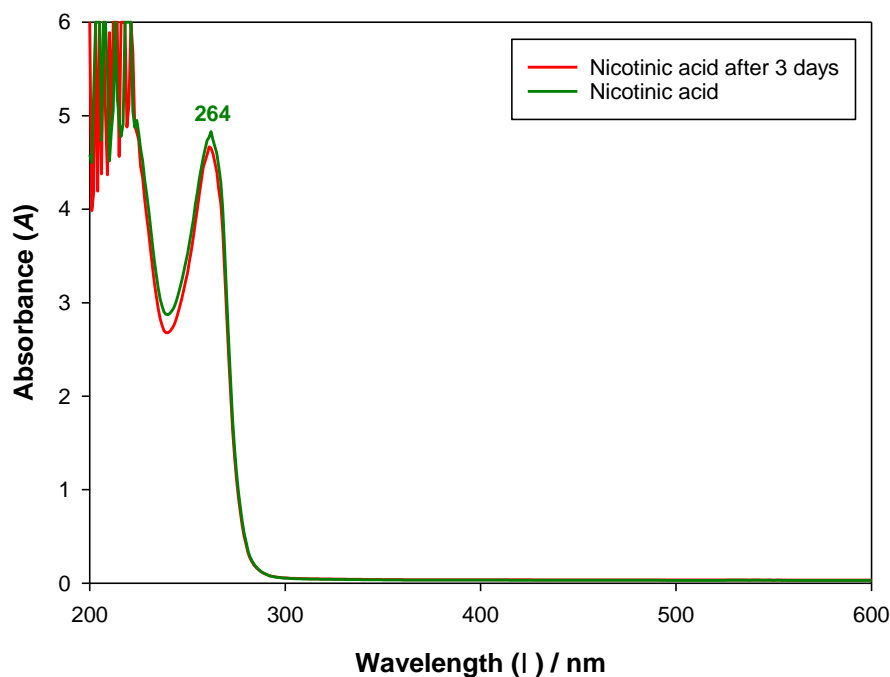

**Figure S5** – UV-Vis absorbance spectra of the aqueous stock solution of nicotinic acid ( $2.50 \cdot 10^4 \text{ g} \cdot \text{mL}^{-1}$  and  $\text{pH} = 7.5$ ) in the moment of preparation and after 3 days of settling at 298.15 K and 0.1 MPa.

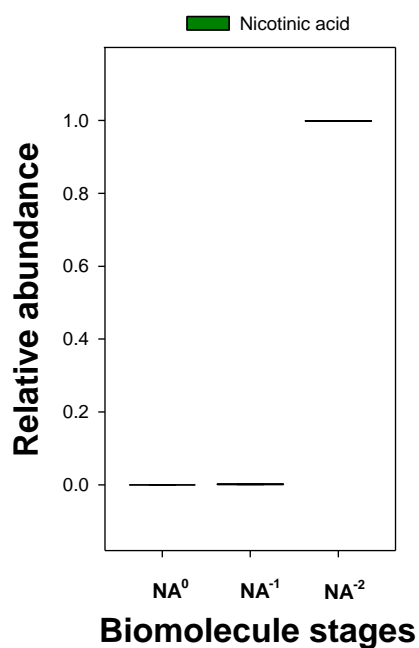

**Figure S6** - Influence of the tie-line compositions in the fraction of the biomolecule stages of nicotinic acid in the ATPS {ethyl lactate (1) + trisodium citrate (2) + water (3)} at 298.15 K and 0.1 MPa.  $\text{NA}^0$ ,  $\text{NA}^{-1}$  and  $\text{NA}^{-2}$  stand for the biomolecule stages of nicotinic acid with electrical charges equal to 0, -1 and -2 e, respectively, and e stands for the elementary charge ( $1.602 \cdot 10^{-19} \text{ C}$ ).

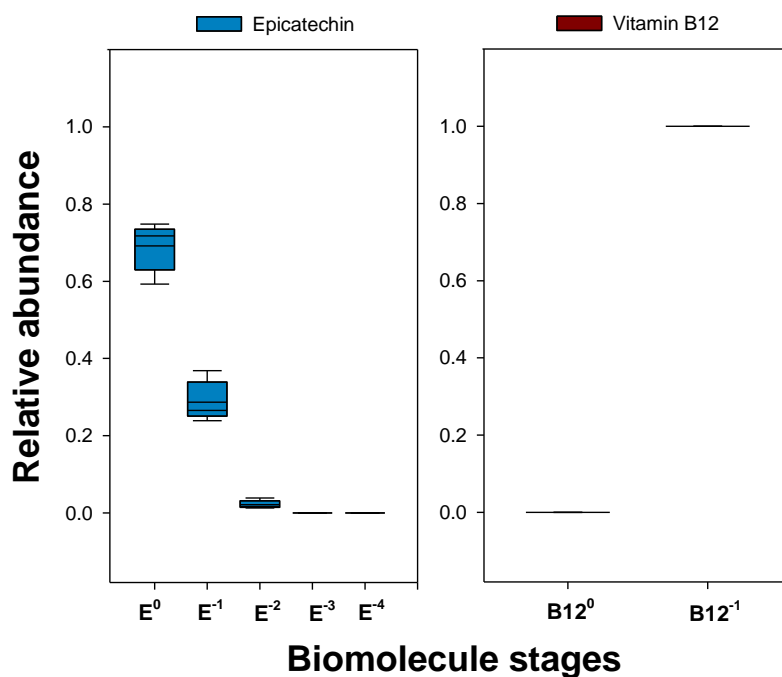

**Figure S7** - Influence of the tie-line compositions in the fraction of the biomolecule stages of epicatechin and cyanocobalamin (vitamin B12) in the ATPS {ethyl lactate (1) + tripotassium citrate (2) + water (3)} at 298.15 K and 0.1 MPa. E<sup>0</sup>, E<sup>-1</sup>, E<sup>-2</sup>, E<sup>-3</sup> and E<sup>-4</sup> stand for the biomolecule stages of epicatechin with electrical charges equal to 0, -1, -2, -3 and -4 e, respectively; B12<sup>0</sup> and B12<sup>-1</sup> stand for the biomolecule stages of cyanocobalamin with electrical charges equal to 0 and -1 e, respectively, and e stands for the elementary charge ( $1.602 \cdot 10^{-19}$  C).

**Table S1:** Calculated fractions of each biomolecule stage and mean electrical charge ( $q$ ) at different pH values for epicatechin.

| pH    | $x_{E^0}^a$ | $x_{E^{-1}}$ | $x_{E^{-2}}$ | $x_{E^{-3}}$ | $x_{E^{-4}}$ | $q / e$ |
|-------|-------------|--------------|--------------|--------------|--------------|---------|
| 0.00  | 1.00        | 0.00         | 0.00         | 0.00         | 0.00         | 0.00    |
| 0.25  | 1.00        | 0.00         | 0.00         | 0.00         | 0.00         | 0.00    |
| 0.50  | 1.00        | 0.00         | 0.00         | 0.00         | 0.00         | 0.00    |
| 0.75  | 1.00        | 0.00         | 0.00         | 0.00         | 0.00         | 0.00    |
| 1.00  | 1.00        | 0.00         | 0.00         | 0.00         | 0.00         | 0.00    |
| 1.25  | 1.00        | 0.00         | 0.00         | 0.00         | 0.00         | 0.00    |
| 1.50  | 1.00        | 0.00         | 0.00         | 0.00         | 0.00         | 0.00    |
| 1.75  | 1.00        | 0.00         | 0.00         | 0.00         | 0.00         | 0.00    |
| 2.00  | 1.00        | 0.00         | 0.00         | 0.00         | 0.00         | 0.00    |
| 2.25  | 1.00        | 0.00         | 0.00         | 0.00         | 0.00         | 0.00    |
| 2.50  | 1.00        | 0.00         | 0.00         | 0.00         | 0.00         | 0.00    |
| 2.75  | 1.00        | 0.00         | 0.00         | 0.00         | 0.00         | 0.00    |
| 3.00  | 1.00        | 0.00         | 0.00         | 0.00         | 0.00         | 0.00    |
| 3.25  | 1.00        | 0.00         | 0.00         | 0.00         | 0.00         | 0.00    |
| 3.50  | 1.00        | 0.00         | 0.00         | 0.00         | 0.00         | 0.00    |
| 3.75  | 1.00        | 0.00         | 0.00         | 0.00         | 0.00         | 0.00    |
| 4.00  | 1.00        | 0.00         | 0.00         | 0.00         | 0.00         | 0.00    |
| 4.25  | 1.00        | 0.00         | 0.00         | 0.00         | 0.00         | 0.00    |
| 4.50  | 1.00        | 0.00         | 0.00         | 0.00         | 0.00         | 0.00    |
| 4.75  | 1.00        | 0.00         | 0.00         | 0.00         | 0.00         | 0.00    |
| 5.00  | 1.00        | 0.00         | 0.00         | 0.00         | 0.00         | 0.00    |
| 5.25  | 1.00        | 0.00         | 0.00         | 0.00         | 0.00         | 0.00    |
| 5.50  | 1.00        | 0.00         | 0.00         | 0.00         | 0.00         | 0.00    |
| 5.75  | 1.00        | 0.00         | 0.00         | 0.00         | 0.00         | 0.00    |
| 6.00  | 1.00        | 0.00         | 0.00         | 0.00         | 0.00         | 0.00    |
| 6.25  | 1.00        | 0.00         | 0.00         | 0.00         | 0.00         | 0.00    |
| 6.50  | 0.99        | 0.01         | 0.00         | 0.00         | 0.00         | -0.01   |
| 6.75  | 0.99        | 0.01         | 0.00         | 0.00         | 0.00         | -0.01   |
| 7.00  | 0.98        | 0.02         | 0.00         | 0.00         | 0.00         | -0.02   |
| 7.25  | 0.97        | 0.03         | 0.00         | 0.00         | 0.00         | -0.03   |
| 7.50  | 0.94        | 0.06         | 0.00         | 0.00         | 0.00         | -0.06   |
| 7.75  | 0.90        | 0.10         | 0.00         | 0.00         | 0.00         | -0.10   |
| 8.00  | 0.84        | 0.16         | 0.01         | 0.00         | 0.00         | -0.17   |
| 8.25  | 0.74        | 0.25         | 0.01         | 0.00         | 0.00         | -0.28   |
| 8.50  | 0.60        | 0.36         | 0.04         | 0.00         | 0.00         | -0.44   |
| 8.75  | 0.44        | 0.47         | 0.09         | 0.00         | 0.00         | -0.65   |
| 9.00  | 0.28        | 0.54         | 0.17         | 0.00         | 0.00         | -0.89   |
| 9.25  | 0.16        | 0.53         | 0.31         | 0.00         | 0.00         | -1.16   |
| 9.50  | 0.08        | 0.45         | 0.46         | 0.01         | 0.00         | -1.41   |
| 9.75  | 0.03        | 0.34         | 0.61         | 0.02         | 0.00         | -1.62   |
| 10.00 | 0.01        | 0.22         | 0.72         | 0.04         | 0.00         | -1.80   |
| 10.25 | 0.00        | 0.14         | 0.78         | 0.08         | 0.00         | -1.94   |
| 10.50 | 0.00        | 0.08         | 0.78         | 0.14         | 0.00         | -2.07   |
| 10.75 | 0.00        | 0.04         | 0.72         | 0.24         | 0.00         | -2.20   |
| 11.00 | 0.00        | 0.02         | 0.62         | 0.36         | 0.00         | -2.35   |
| 11.25 | 0.00        | 0.01         | 0.48         | 0.51         | 0.00         | -2.50   |
| 11.50 | 0.00        | 0.00         | 0.35         | 0.64         | 0.01         | -2.66   |
| 11.75 | 0.00        | 0.00         | 0.23         | 0.75         | 0.02         | -2.79   |
| 12.00 | 0.00        | 0.00         | 0.14         | 0.83         | 0.03         | -2.89   |
| 12.25 | 0.00        | 0.00         | 0.08         | 0.86         | 0.06         | -2.98   |
| 12.50 | 0.00        | 0.00         | 0.05         | 0.85         | 0.11         | -3.06   |
| 12.75 | 0.00        | 0.00         | 0.02         | 0.80         | 0.18         | -3.15   |
| 13.00 | 0.00        | 0.00         | 0.01         | 0.71         | 0.28         | -3.27   |
| 13.25 | 0.00        | 0.00         | 0.01         | 0.58         | 0.41         | -3.41   |
| 13.50 | 0.00        | 0.00         | 0.00         | 0.44         | 0.56         | -3.55   |
| 13.75 | 0.00        | 0.00         | 0.00         | 0.31         | 0.69         | -3.69   |
| 14.00 | 0.00        | 0.00         | 0.00         | 0.20         | 0.80         | -3.80   |

<sup>a</sup>  $x_{E^0}$ ,  $x_{E^{-1}}$ ,  $x_{E^{-2}}$ ,  $x_{E^{-3}}$  and  $x_{E^{-4}}$  are the fractions of epicatechin in the biomolecule stages of electrical charges equal to 0, -1, -2, -3 and -4 e, respectively. e stands for the elementary charge ( $1.602 \cdot 10^{-19}$  C).

**Table S2:** Calculated fractions of each biomolecule stage and mean electrical charge ( $q$ ) at different pH values for vitamin B12.

| pH    | $x_{B12^0}$ <sup>a</sup> | $x_{B12^{-1}}$ | $q / e$ |
|-------|--------------------------|----------------|---------|
| 0.00  | 1.00                     | 0.00           | 0.00    |
| 0.25  | 1.00                     | 0.00           | 0.00    |
| 0.50  | 1.00                     | 0.00           | 0.00    |
| 0.75  | 1.00                     | 0.00           | 0.00    |
| 1.00  | 0.99                     | 0.01           | -0.01   |
| 1.25  | 0.99                     | 0.01           | -0.01   |
| 1.50  | 0.98                     | 0.02           | -0.02   |
| 1.75  | 0.97                     | 0.03           | -0.03   |
| 2.00  | 0.95                     | 0.05           | -0.05   |
| 2.25  | 0.91                     | 0.09           | -0.09   |
| 2.50  | 0.86                     | 0.14           | -0.14   |
| 2.75  | 0.77                     | 0.23           | -0.23   |
| 3.00  | 0.66                     | 0.34           | -0.34   |
| 3.25  | 0.52                     | 0.48           | -0.48   |
| 3.50  | 0.38                     | 0.62           | -0.62   |
| 3.75  | 0.25                     | 0.75           | -0.75   |
| 4.00  | 0.16                     | 0.84           | -0.84   |
| 4.25  | 0.10                     | 0.90           | -0.90   |
| 4.50  | 0.06                     | 0.94           | -0.94   |
| 4.75  | 0.03                     | 0.97           | -0.97   |
| 5.00  | 0.02                     | 0.98           | -0.98   |
| 5.25  | 0.01                     | 0.99           | -0.99   |
| 5.50  | 0.01                     | 0.99           | -0.99   |
| 5.75  | 0.00                     | 1.00           | -1.00   |
| 6.00  | 0.00                     | 1.00           | -1.00   |
| 6.25  | 0.00                     | 1.00           | -1.00   |
| 6.50  | 0.00                     | 1.00           | -1.00   |
| 6.75  | 0.00                     | 1.00           | -1.00   |
| 7.00  | 0.00                     | 1.00           | -1.00   |
| 7.25  | 0.00                     | 1.00           | -1.00   |
| 7.50  | 0.00                     | 1.00           | -1.00   |
| 7.75  | 0.00                     | 1.00           | -1.00   |
| 8.00  | 0.00                     | 1.00           | -1.00   |
| 8.25  | 0.00                     | 1.00           | -1.00   |
| 8.50  | 0.00                     | 1.00           | -1.00   |
| 8.75  | 0.00                     | 1.00           | -1.00   |
| 9.00  | 0.00                     | 1.00           | -1.00   |
| 9.25  | 0.00                     | 1.00           | -1.00   |
| 9.50  | 0.00                     | 1.00           | -1.00   |
| 9.75  | 0.00                     | 1.00           | -1.00   |
| 10.00 | 0.00                     | 1.00           | -1.00   |
| 10.25 | 0.00                     | 1.00           | -1.00   |
| 10.50 | 0.00                     | 1.00           | -1.00   |
| 10.75 | 0.00                     | 1.00           | -1.00   |
| 11.00 | 0.00                     | 1.00           | -1.00   |
| 11.25 | 0.00                     | 1.00           | -1.00   |
| 11.50 | 0.00                     | 1.00           | -1.00   |
| 11.75 | 0.00                     | 1.00           | -1.00   |
| 12.00 | 0.00                     | 1.00           | -1.00   |
| 12.25 | 0.00                     | 1.00           | -1.00   |
| 12.50 | 0.00                     | 1.00           | -1.00   |
| 12.75 | 0.00                     | 1.00           | -1.00   |
| 13.00 | 0.00                     | 1.00           | -1.00   |
| 13.25 | 0.00                     | 1.00           | -1.00   |
| 13.50 | 0.00                     | 1.00           | -1.00   |
| 13.75 | 0.00                     | 1.00           | -1.00   |
| 14.00 | 0.00                     | 1.00           | -1.00   |

<sup>a</sup>  $x_{B12^0}$ , and  $x_{B12^{-1}}$  are the fractions of vitamin B12 in the biomolecule stages of electrical charges equal to 0 and -1 e, respectively. e stands for the elementary charge ( $1.602 \cdot 10^{-19}$  C).

**Table S3:** Calculated fractions of each biomolecule stage and mean electrical charge ( $q$ ) at different pH values for nicotinic acid.

| pH    | $x_{\text{NA}^0}^a$ | $x_{\text{NA}^{-1}}$ | $x_{\text{NA}^{-2}}$ | $q / e$ |
|-------|---------------------|----------------------|----------------------|---------|
| 0.00  | 0.99                | 0.01                 | 0.00                 | -0.01   |
| 0.25  | 0.98                | 0.02                 | 0.00                 | -0.02   |
| 0.50  | 0.97                | 0.03                 | 0.00                 | -0.03   |
| 0.75  | 0.95                | 0.05                 | 0.00                 | -0.05   |
| 1.00  | 0.91                | 0.09                 | 0.00                 | -0.09   |
| 1.25  | 0.85                | 0.15                 | 0.00                 | -0.15   |
| 1.50  | 0.76                | 0.24                 | 0.00                 | -0.24   |
| 1.75  | 0.64                | 0.36                 | 0.00                 | -0.36   |
| 2.00  | 0.50                | 0.50                 | 0.00                 | -0.50   |
| 2.25  | 0.36                | 0.64                 | 0.00                 | -0.64   |
| 2.50  | 0.24                | 0.76                 | 0.00                 | -0.76   |
| 2.75  | 0.15                | 0.84                 | 0.01                 | -0.86   |
| 3.00  | 0.09                | 0.90                 | 0.01                 | -0.92   |
| 3.25  | 0.05                | 0.92                 | 0.02                 | -0.97   |
| 3.50  | 0.03                | 0.93                 | 0.04                 | -1.02   |
| 3.75  | 0.02                | 0.91                 | 0.08                 | -1.06   |
| 4.00  | 0.01                | 0.86                 | 0.13                 | -1.12   |
| 4.25  | 0.00                | 0.78                 | 0.21                 | -1.21   |
| 4.50  | 0.00                | 0.67                 | 0.32                 | -1.32   |
| 4.75  | 0.00                | 0.54                 | 0.46                 | -1.46   |
| 5.00  | 0.00                | 0.40                 | 0.60                 | -1.60   |
| 5.25  | 0.00                | 0.27                 | 0.73                 | -1.73   |
| 5.50  | 0.00                | 0.17                 | 0.83                 | -1.83   |
| 5.75  | 0.00                | 0.11                 | 0.89                 | -1.89   |
| 6.00  | 0.00                | 0.06                 | 0.94                 | -1.94   |
| 6.25  | 0.00                | 0.04                 | 0.96                 | -1.96   |
| 6.50  | 0.00                | 0.02                 | 0.98                 | -1.98   |
| 6.75  | 0.00                | 0.01                 | 0.99                 | -1.99   |
| 7.00  | 0.00                | 0.01                 | 0.99                 | -1.99   |
| 7.25  | 0.00                | 0.00                 | 1.00                 | -2.00   |
| 7.50  | 0.00                | 0.00                 | 1.00                 | -2.00   |
| 7.75  | 0.00                | 0.00                 | 1.00                 | -2.00   |
| 8.00  | 0.00                | 0.00                 | 1.00                 | -2.00   |
| 8.25  | 0.00                | 0.00                 | 1.00                 | -2.00   |
| 8.50  | 0.00                | 0.00                 | 1.00                 | -2.00   |
| 8.75  | 0.00                | 0.00                 | 1.00                 | -2.00   |
| 9.00  | 0.00                | 0.00                 | 1.00                 | -2.00   |
| 9.25  | 0.00                | 0.00                 | 1.00                 | -2.00   |
| 9.50  | 0.00                | 0.00                 | 1.00                 | -2.00   |
| 9.75  | 0.00                | 0.00                 | 1.00                 | -2.00   |
| 10.00 | 0.00                | 0.00                 | 1.00                 | -2.00   |
| 10.25 | 0.00                | 0.00                 | 1.00                 | -2.00   |
| 10.50 | 0.00                | 0.00                 | 1.00                 | -2.00   |
| 10.75 | 0.00                | 0.00                 | 1.00                 | -2.00   |
| 11.00 | 0.00                | 0.00                 | 1.00                 | -2.00   |
| 11.25 | 0.00                | 0.00                 | 1.00                 | -2.00   |
| 11.50 | 0.00                | 0.00                 | 1.00                 | -2.00   |
| 11.75 | 0.00                | 0.00                 | 1.00                 | -2.00   |
| 12.00 | 0.00                | 0.00                 | 1.00                 | -2.00   |
| 12.25 | 0.00                | 0.00                 | 1.00                 | -2.00   |
| 12.50 | 0.00                | 0.00                 | 1.00                 | -2.00   |
| 12.75 | 0.00                | 0.00                 | 1.00                 | -2.00   |
| 13.00 | 0.00                | 0.00                 | 1.00                 | -2.00   |
| 13.25 | 0.00                | 0.00                 | 1.00                 | -2.00   |
| 13.50 | 0.00                | 0.00                 | 1.00                 | -2.00   |
| 13.75 | 0.00                | 0.00                 | 1.00                 | -2.00   |
| 14.00 | 0.00                | 0.00                 | 1.00                 | -2.00   |

<sup>a</sup>  $x_{\text{NA}^0}$ ,  $x_{\text{NA}^{-1}}$ , and  $x_{\text{NA}^{-2}}$  are the fractions of nicotinic acid in the biomolecule stages of electrical charges equal to 0, -1 and -2 e, respectively. e stands for the elementary charge ( $1.602 \cdot 10^{-19}$  C).
